# Supplementary material for: METTL3-dependent m6A modification programs T follicular helper cell differentiation
Source: PubMed Central journal article supplement (PMC7910450; doi:10.1038/s41467-021-21594-6), 2021-02-26
Supplement: 41467_2021_21594_MOESM1_ESM.pdf [file 41467_2021_21594_MOESM1_ESM.pdf]

# Supplementary information

## **METTL3-dependent m<sup>6</sup>A modification programs T follicular helper cell differentiation**

Yingpeng Yao<sup>#</sup>, Ying Yang<sup>#</sup>, Wenhui Guo<sup>#</sup>, Lifan Xu<sup>#</sup>, Menghao You, Yi-Chang Zhang, Zhen Sun, Xiao Cui, Guotao Yu, Zhihong Qi, Jingjing Liu, Fang Wang, Juanjuan Liu, Tianyan Zhao, Lilin Ye<sup>\*</sup>, Yun-Gui Yang<sup>\*</sup>, Shuyang Yu<sup>\*</sup>

<sup>#</sup> These authors contributed equally to this work.

<sup>\*</sup> Correspondence: yelilinlcmv@tmmu.edu.cn (L.Y.), ygyang@big.ac.cn (Y.-G.Y.), ysy@cau.edu.cn (S.Y.).

## Yao et al. Supplementary Figure 1

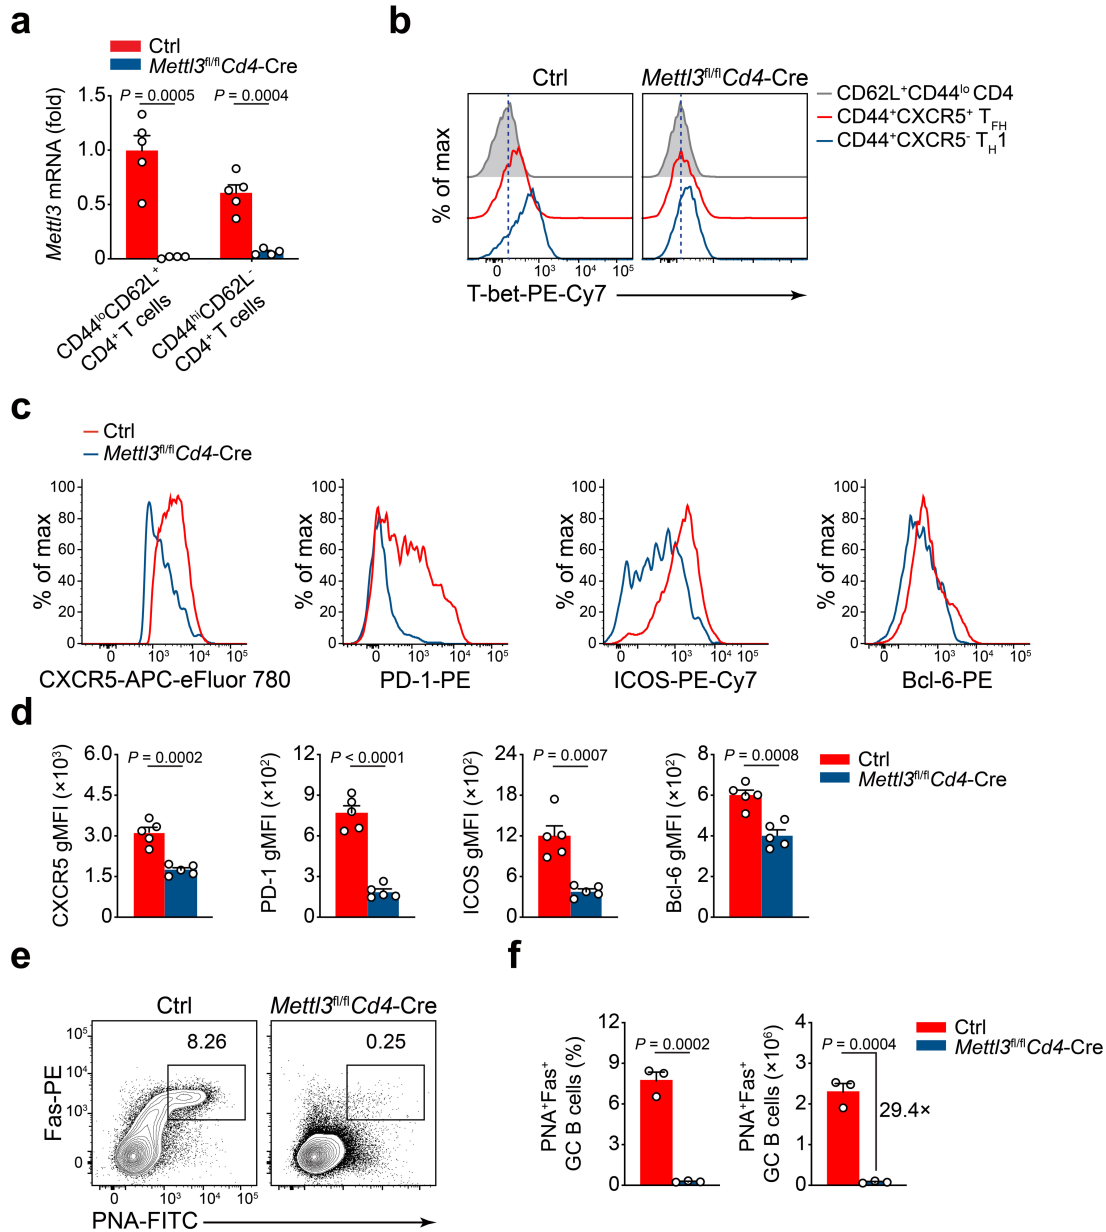

### Supplementary Figure 1. METTL3 is critical for T<sub>FH</sub> differentiation and humoral immunity.

**a** Quantitative RT-PCR analysis of the abundance of *Mettl3* mRNA in CD44<sup>lo</sup>CD62L<sup>+</sup> CD4<sup>+</sup> T cells (Naïve) and CD44<sup>hi</sup>CD62L<sup>-</sup>CD4<sup>+</sup> T cells (Effector) from Ctrl and *Mettl3<sup>fl/fl</sup>Cd4-Cre* mice, relative expression was normalized to Ctrl Naïve cells ( $n = 5$  for Ctrl group,  $n = 4$  for *Mettl3<sup>fl/fl</sup>Cd4-Cre* group).

**b** Flow cytometry analysis of expression level of T-bet on CD62L<sup>+</sup>CD44<sup>lo</sup> CD4 cells, CD44<sup>+</sup>CXCR5<sup>+</sup> T<sub>FH</sub> cells, and CD44<sup>+</sup>CXCR5<sup>-</sup> T<sub>H1</sub> cells from Ctrl and *Mettl3<sup>fl/fl</sup>Cd4-Cre* mice on 8 *dpi*.

**c** Flow cytometry analysis of expression levels of CXCR5, PD-1, ICOS, and Bcl-6 on CD44<sup>+</sup>CXCR5<sup>+</sup> T<sub>FH</sub> cells on 8 *dpi*.

**d** Quantification of the gMFIs of CXCR5, PD-1, ICOS, and Bcl-6 on CD44<sup>+</sup>CXCR5<sup>+</sup> T<sub>FH</sub> cells as described in **c** ( $n = 5$  per group).

**e, f** Flow cytometry analysis of PNA<sup>+</sup>Fas<sup>+</sup> GC B cells on 8 *dpi*. Summary of the frequency and cell numbers of GC B cells are shown in **f** ( $n = 3$  per group).

Data are representative of two (**a**) or at least three (**b-f**) independent experiments. Error bars indicate standard error of the mean. *P* value was calculated by unpaired two-tailed Student's *t*-test.

Yao et al. Supplementary Figure 2

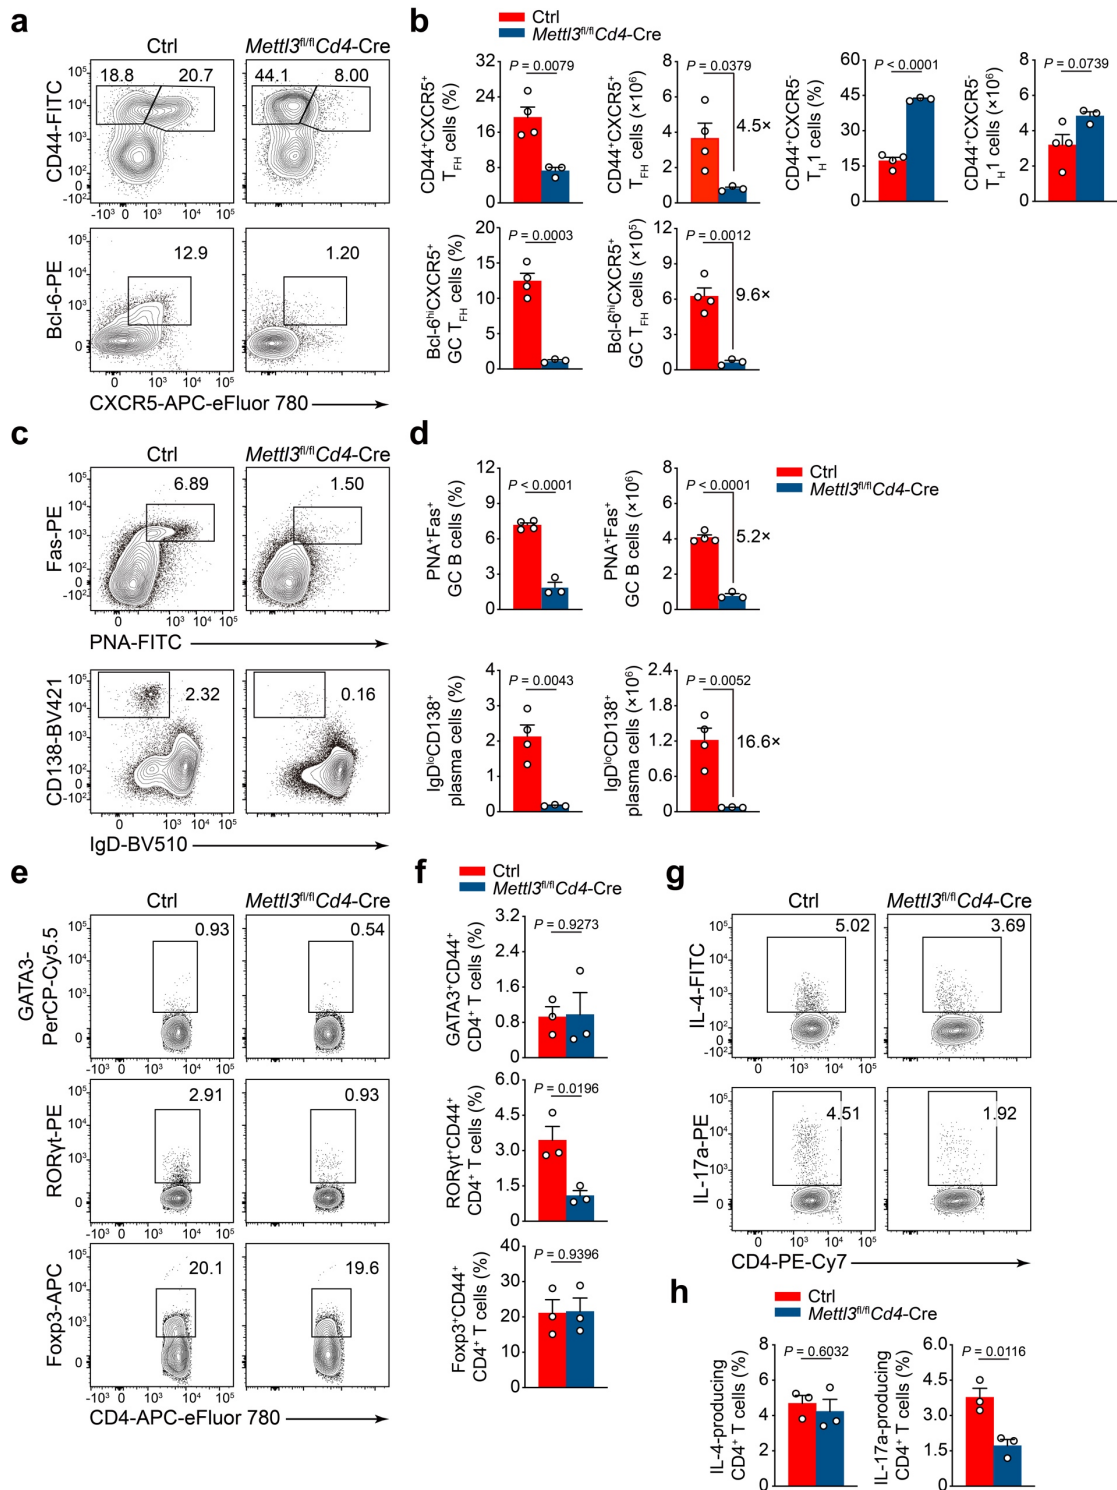

Supplementary Figure 2 METTL3 is essential for T<sub>FH</sub> differentiation in KLH immunization model.

**a, b** Flow cytometry analysis of splenic CD44<sup>+</sup>CXCR5<sup>+</sup> T<sub>FH</sub> cells and CD44<sup>+</sup>CXCR5<sup>-</sup> T<sub>H1</sub> cells gated on CD4<sup>+</sup> T cells (top panel), and Bcl-6<sup>hi</sup>CXCR5<sup>+</sup> GC T<sub>FH</sub> cells gated on CD44<sup>hi</sup>CD62L<sup>lo</sup>CD4<sup>+</sup> T cells (bottom panel) from Ctrl and *Mettl3*<sup>fl/fl</sup>*Cd4*-Cre mice on day 8 post immunization. Summary of the frequency and cell numbers of T<sub>FH</sub> cells, T<sub>H1</sub> cells, and GC T<sub>FH</sub> cells are shown in **b** ( $n = 4$  for Ctrl group,  $n = 3$  for *Mettl3*<sup>fl/fl</sup>*Cd4*-Cre group).

**c, d** Flow cytometry analysis of splenic Fas<sup>+</sup>PNA<sup>+</sup> GC B cells (top panel) and IgD<sup>lo</sup>CD138<sup>+</sup> plasma cells (bottom panel) on day 8 post immunization. Summary of the frequency and cell numbers of GC B cells and plasma cells are shown in **d** ( $n = 4$  for Ctrl group,  $n = 3$  for *Mettl3*<sup>fl/fl</sup>*Cd4*-Cre group).

**e, f** Flow cytometry analysis of GATA3<sup>+</sup> (top panel), ROR $\gamma$ t<sup>+</sup> (middle panel), and Foxp3<sup>+</sup> cells (bottom panel) gated on CD44<sup>hi</sup>CD62L<sup>lo</sup>CD4<sup>+</sup> T cells from Ctrl and *Mettl3*<sup>fl/fl</sup>*Cd4*-Cre mice on day 8 post immunization. Summary of the frequency of indicated subsets is shown in **f** ( $n = 3$  per group).

**g, h** Splenocytes from KLH-immunized Ctrl and *Mettl3*<sup>fl/fl</sup>*Cd4*-Cre mice were restimulated with PMA and Ionomycin for 5 h at 37°C for detection of IL-4 and IL-17a expression by intracellular cytokine staining. Summary of the frequency of indicated subsets is shown in **h** ( $n = 3$  per group).

Data are representative of two (**e-h**) or three (**a-d**) independent experiments. Error bars indicate standard error of the mean. *P* value was calculated by unpaired two-tailed Student's *t*-test.

### Yao et al. Supplementary Figure 3

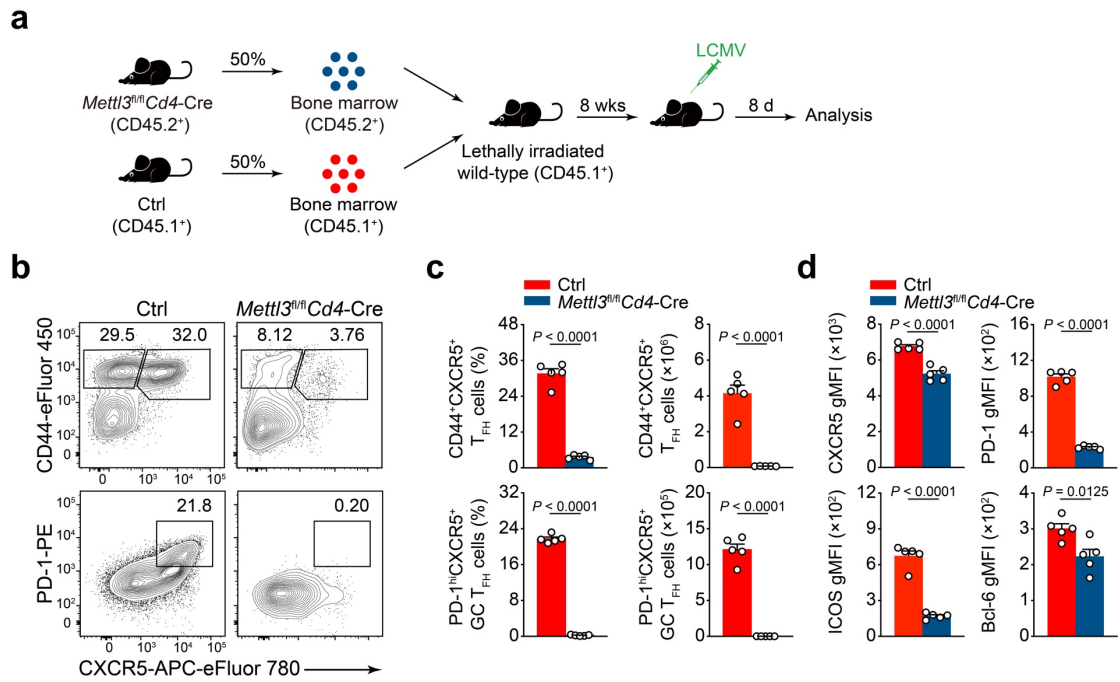

### Supplementary Figure 3 METTL3 intrinsically regulates T<sub>FH</sub> differentiation.

**a** Generation of bone marrow (BM) chimera.  $5 \times 10^6$  cells of a 1:1 mixture of *Mettl3<sup>fl/fl</sup>Cd4-Cre* (CD45.2<sup>+</sup>) and Ctrl (CD45.1<sup>+</sup>) competitor BM cells were transferred into lethally irradiated wild-type (CD45.1<sup>+</sup>) recipient mice. After 8 weeks reconstitution, recipient mice were infected with LCMV-Armstrong and analyzed by flow cytometry.

**b, c** Flow cytometry analysis of CD44<sup>+</sup>CXCR5<sup>+</sup> T<sub>FH</sub> cells gated on CD4<sup>+</sup> T cells (top panel) and PD-1<sup>hi</sup>CXCR5<sup>+</sup> GC T<sub>FH</sub> cells gated on CD44<sup>hi</sup>CD62L<sup>lo</sup>CD4<sup>+</sup> T cells (bottom panel) from the mixed BM chimeric mice on 8 *dpi*. Summary of the frequency and cell numbers of T<sub>FH</sub> cells and GC T<sub>FH</sub> cells are shown in **c** ( $n = 5$  per group).

**d** Quantification of gMFIs of CXCR5, PD-1, ICOS, and Bcl-6 on donor CD44<sup>+</sup>CXCR5<sup>+</sup> T<sub>FH</sub> cells ( $n = 5$  per group).

Data are representative of two independent experiments. Error bars indicate standard error of the mean. *P* value was calculated by unpaired two-tailed Student's *t*-test.

## Yao et al. Supplementary Figure 4

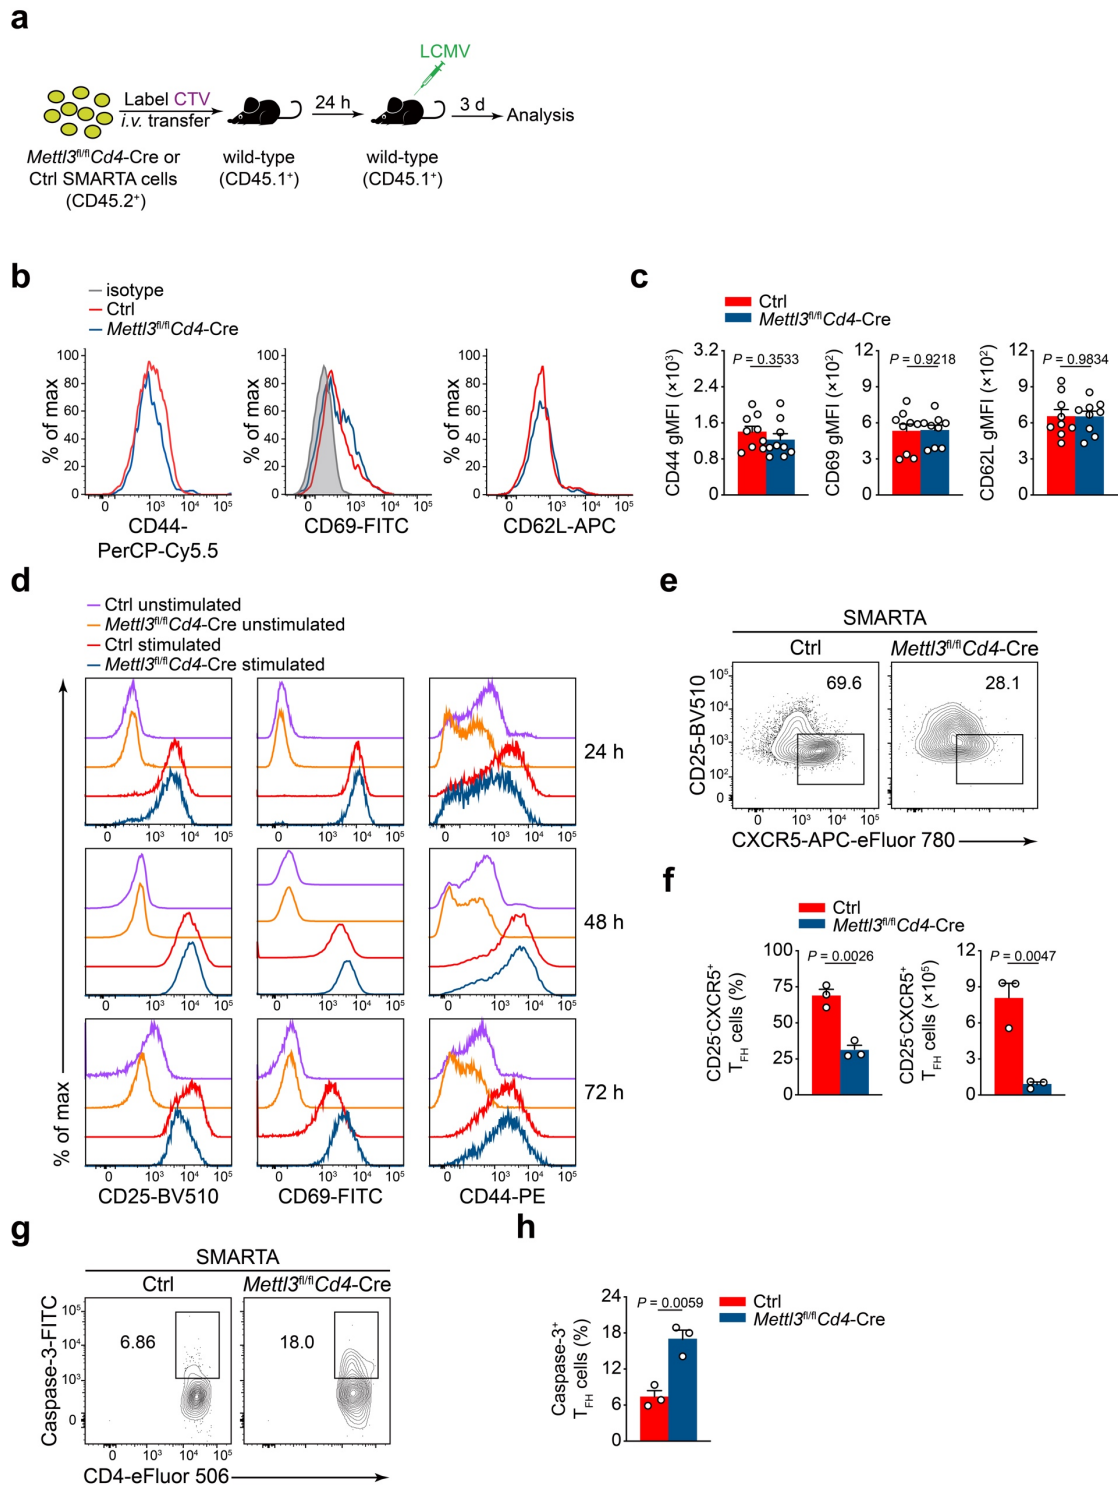

### Supplementary Figure 4 METTL3 is necessary for the early T<sub>FH</sub> differentiation.

a Scheme of adoptive transfer model. Naïve CTV-labeled SMARTA cells were adoptively transferred into wild-type recipients (CD45.1<sup>+</sup>), followed by LCMV-

Armstrong infection *i.v.*, and splenic cells were analyzed on day 3 post infection by flow cytometry.

**b** Flow cytometry analysis of expression levels of CD44, CD69, and CD62L on SMARTA CD4<sup>+</sup> T cells from recipient mice as in **a**.

**c** Quantification of the gMFIs of CD44, CD69, and CD62L on SMARTA CD4<sup>+</sup> T cells as described in **b**, *n* = 9 per group.

**d** Splenic CD4<sup>+</sup> T cells from *Mettl3<sup>fl/fl</sup>*Cd4-Cre or Ctrl mice were left unstimulated or stimulated with  $\alpha$ -CD3/CD28 for 3 days. Histograms showing CD25, CD69, and CD44 expression on SMARTA CD4<sup>+</sup> T cells, *n* = 3 per group.

**e, f** Flow cytometry analysis of CXCR5<sup>+</sup>CD25<sup>-</sup> T<sub>FH</sub> cells gated on SMARTA CD4<sup>+</sup> T cells from recipient mice as in **a**. Summary of the frequency and cell numbers of T<sub>FH</sub> cells are shown in **f**, *n* = 3 per group.

**g, h** Flow cytometry analysis of Caspase-3<sup>+</sup>CXCR5<sup>+</sup>CD25<sup>-</sup> T<sub>FH</sub> cells among SMARTA cells from recipient mice as in **a**. Summary of the frequency and cell numbers of T<sub>FH</sub> cells are shown in **h**, *n* = 3 per group.

Data are representative of three independent experiments (**d-h**) or pooled from three independent experiments (**b, c**). Error bars indicate standard error of the mean. *P* value was calculated by unpaired two-tailed Student's *t*-test.



Yao et al. Supplementary Figure 5

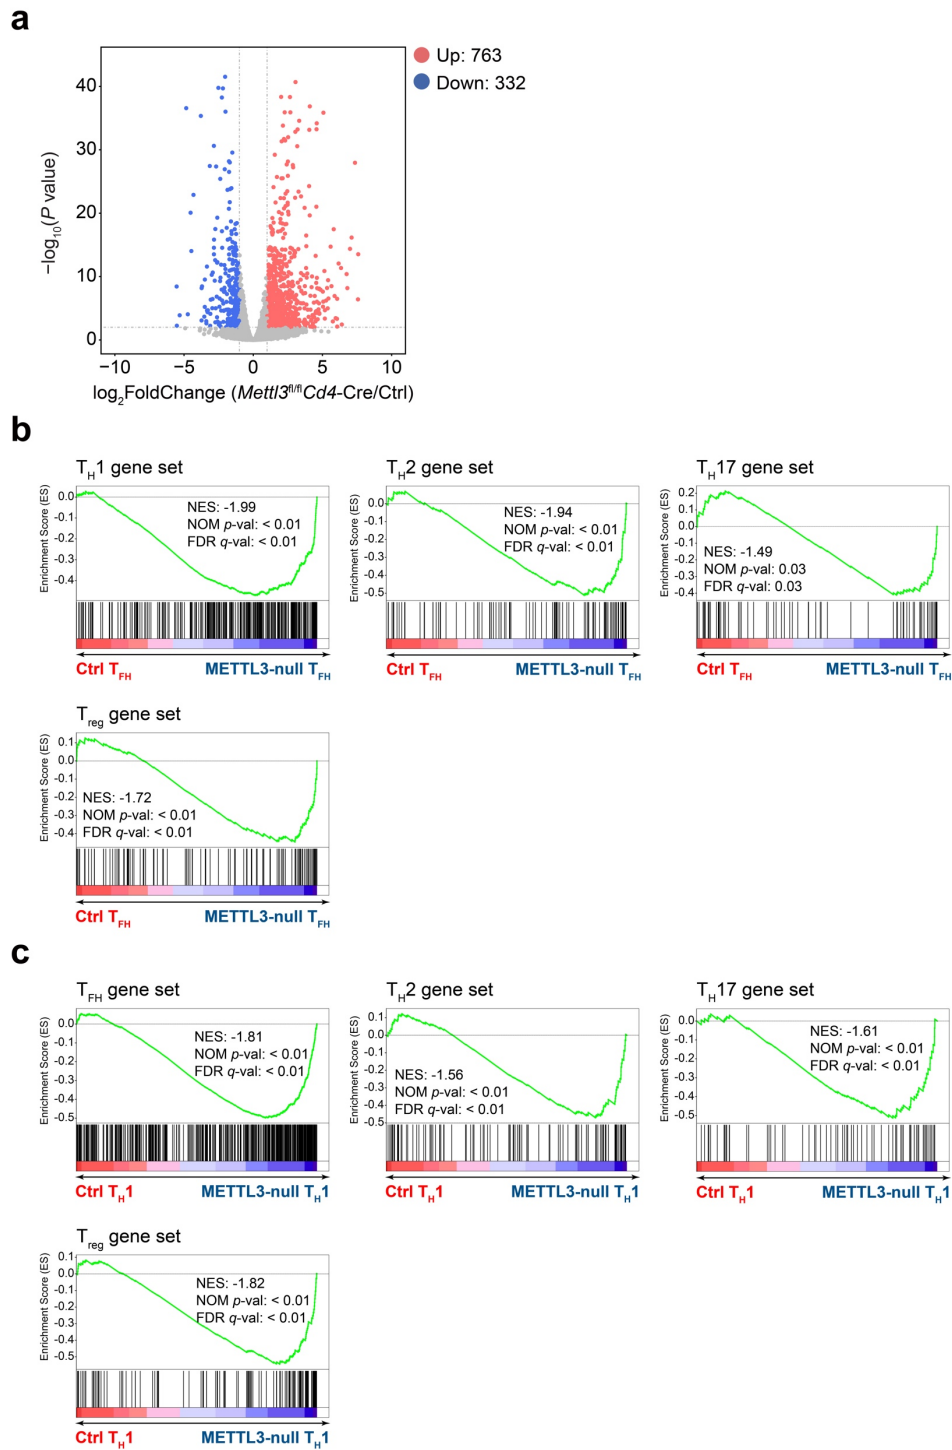

Supplementary Figure 5 GSEA analysis.

**a** Volcano map depicting genes upregulated (red) or downregulated (blue) 2-fold or more in T<sub>H</sub>1 cells on 8 *dpi*.  $P$  value was calculated by Wald test.

**b** GSEA enrichment plots showing T<sub>H</sub>1, T<sub>H</sub>2, T<sub>H</sub>17, and Treg-associated gene sets are enriched in *Mettl3<sup>fl/fl</sup>Cd4-Cre* T<sub>FH</sub> cells. *P* value was calculated by multiple hypothesis testing.

**c** GSEA enrichment plots showing T<sub>FH</sub>, T<sub>H</sub>2, T<sub>H</sub>17, and Treg-associated gene sets are enriched in *Mettl3<sup>fl/fl</sup>Cd4-Cre* T<sub>H</sub>1 cells. *P* value was calculated by multiple hypothesis testing.

Yao et al. Supplementary Figure 6

**a**

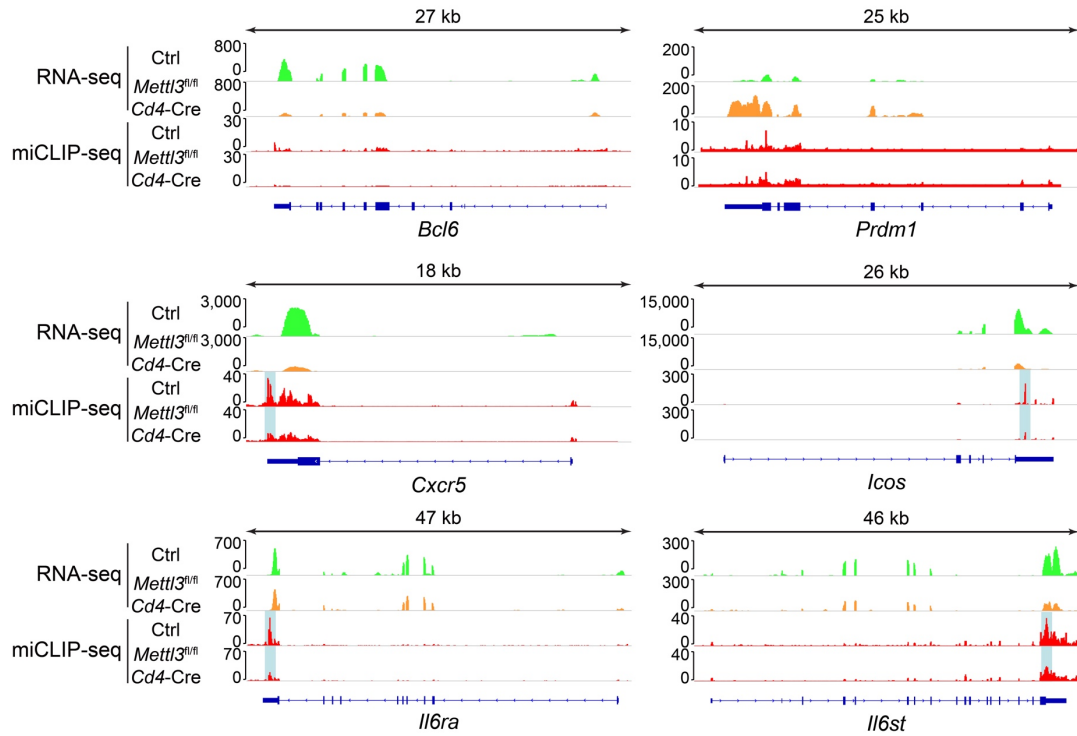

**b**

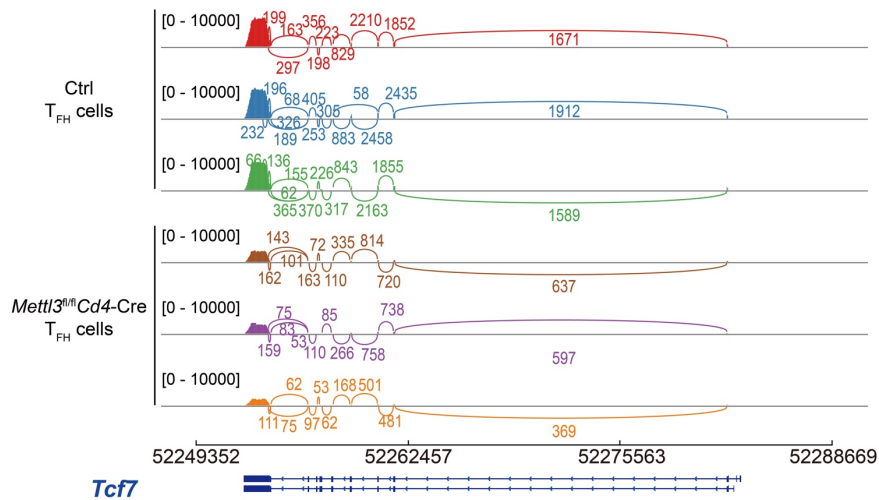

Supplementary Figure 6 m<sup>6</sup>A directly modifies a series of T<sub>FH</sub> cell-associated transcripts.

a IGV tracks displaying RNA-seq (top panel) and m<sup>6</sup>A-miCLIP-SMARTer-seq (bottom panel) reads distribution of interested genes. The baby blue highlight denotes significant m<sup>6</sup>A peak.

**b** Sashimi plot showing read coverage and the reads that map to exon-exon junctions with arches. The numbers on the arches are the number of reads that map to that exon-exon junction.

**Yao et al. Supplementary Figure 7**

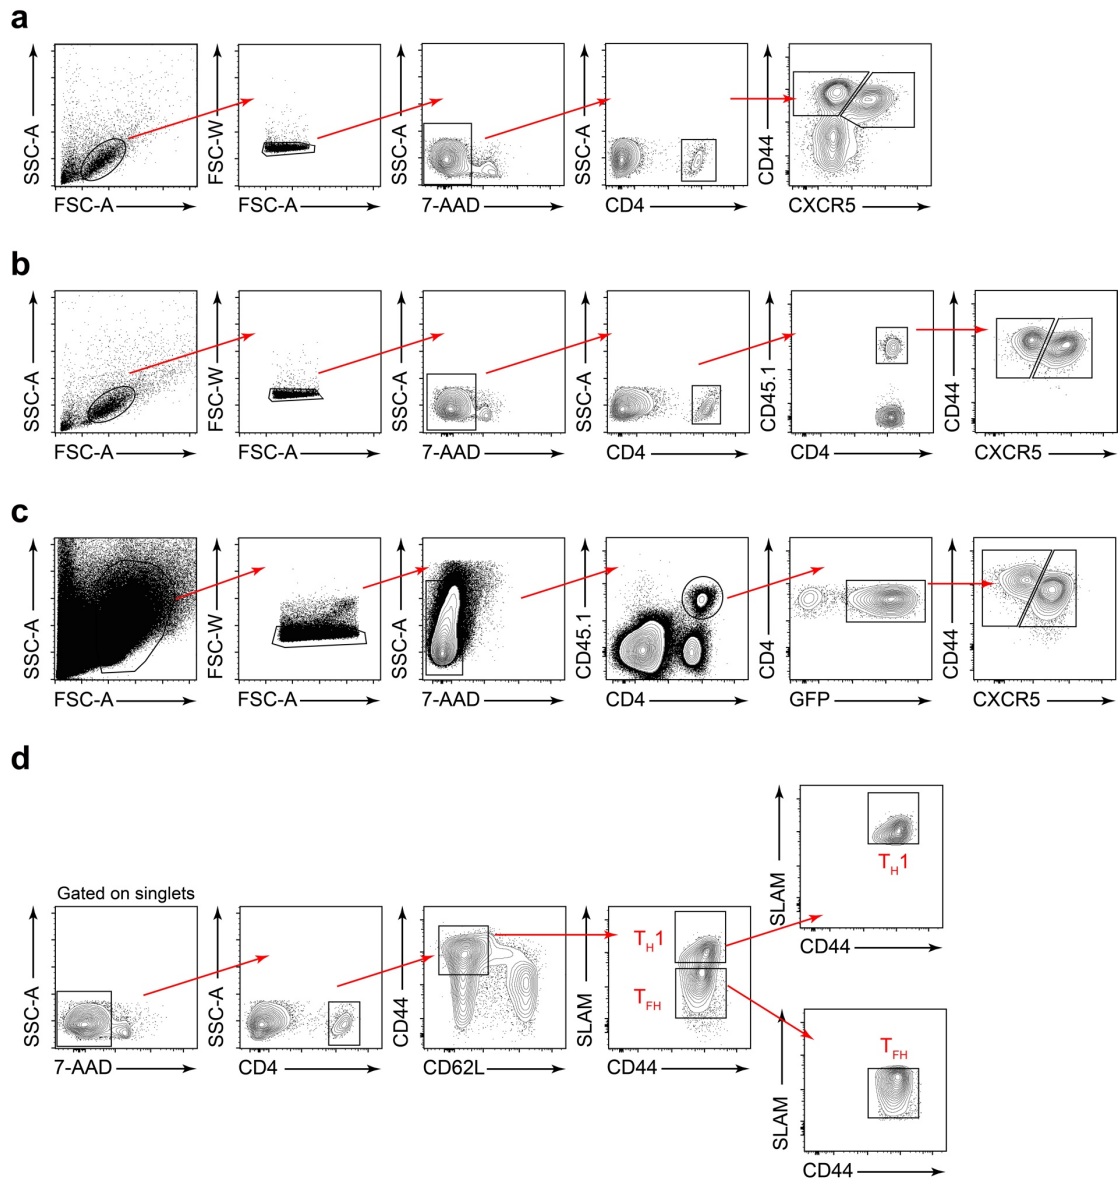

**Supplementary Figure 7 Gating strategy for flow cytometry analysis and cell sorting.**

**a** Analysis of polyclonal T<sub>FH</sub> cell responses to LCMV-Armstrong infection and immunization (related to Figure 1, 2, S1, S2, and S3).

**b** Analysis of monoclonal T<sub>FH</sub> cell responses to LCMV-Armstrong infection (related to Figure 2, 3, and S4).

**c** Analysis of T<sub>FH</sub> cell responses after retroviral transduction (related to Figure 5 and 7).

**d** Because METTL3 deficiency affects CXCR5 expression, for RNA-seq analysis, CD44<sup>+</sup>SLAM<sup>hi</sup> T<sub>H</sub>1 cells and CD44<sup>+</sup>SLAM<sup>lo</sup> T<sub>FH</sub> cells were sorted for further analysis (related to Figure 4 and S5).

**Yao et al. Supplementary Figure 8**

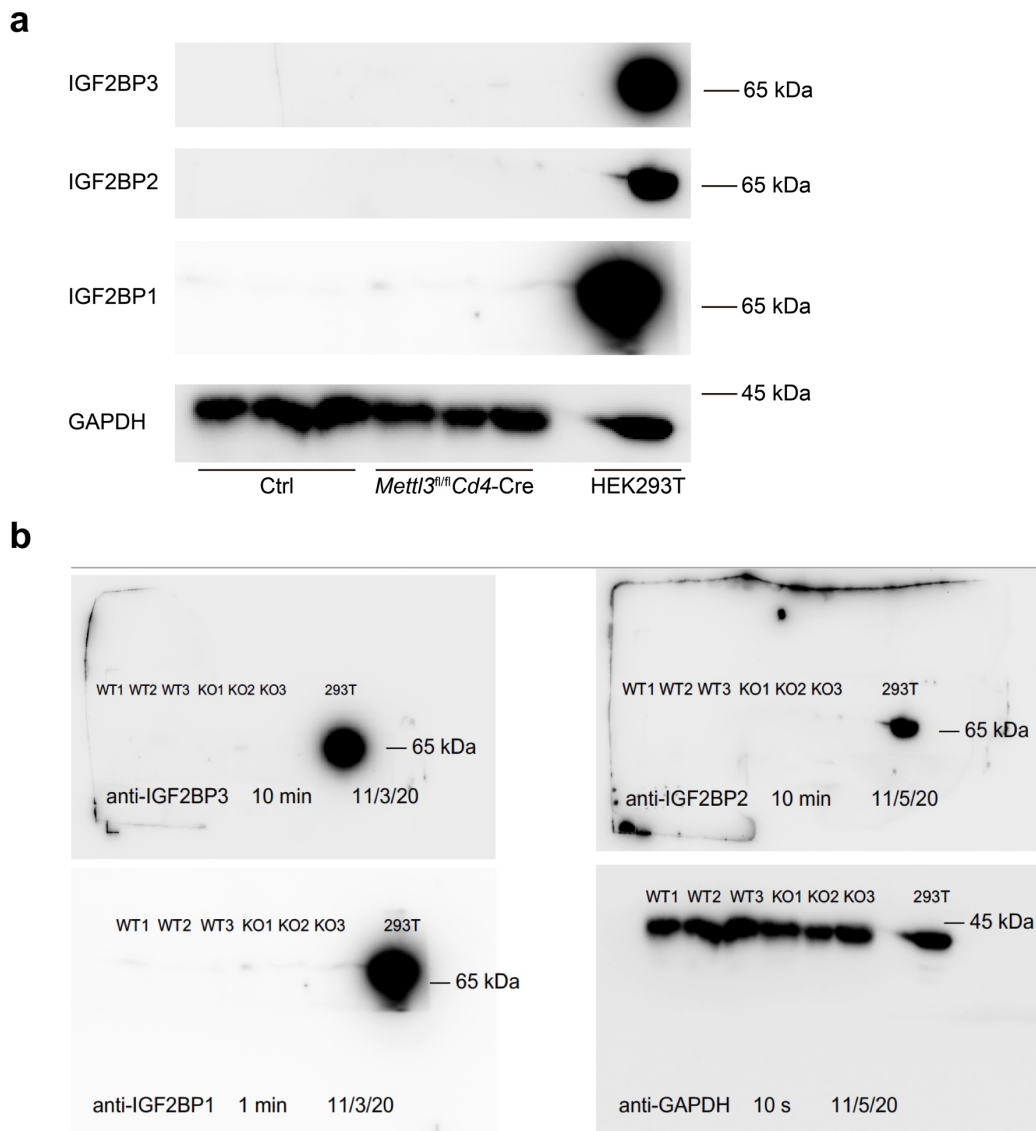

**Supplementary Figure 8 Analysis of IGF2BPs by immunoblotting.**

**a** CD4<sup>+</sup> T cells sorted from Ctrl or *Mettl3<sup>fl/fl</sup>Cd4-Cre* mice together with HEK293 T cells were subjected to Western blotting with antibodies specific for IGF2BP1, IGF2BP2, IGF2BP3, and GAPDH. Data are representative of two independent experiments.

**b** Uncropped images for **a**.

**Yao et al. Supplementary Table 1**

Primers for quantitative RT-PCR, m<sup>6</sup>A-RIP-qPCR, and RIP-qPCR.

| <i>Primers for quantitative RT-PCR</i>                  |                        |                        |
|---------------------------------------------------------|------------------------|------------------------|
| Gene                                                    | 5' primer (5'→3')      | 3' primer (5'→3')      |
| <i>Gapdh</i>                                            | ACTCCACTCACGGCAAATTCA  | GGCCTCACCCCATTTGATG    |
| <i>Hprt1</i>                                            | GCGTCGTGATTAGCGATGATG  | CTCGAGCAAGTCTTTCAGTCC  |
| <i>Bcl6</i>                                             | AGACGCACAGTGACAAACCA   | AGTGTGGGTCTTCAGGTTGG   |
| <i>Tcf7</i>                                             | CCCTTCCTGCGGATATAGAC   | GGTACACCAGATCCCAGCAT   |
| <i>Lef1</i>                                             | TGAGTGCACGCTAAAGGAGA   | CTGACCAGCCTGGATAAAGC   |
| <i>Cxcr5</i>                                            | CATGGGCTCCATCACATACA   | GGCATGAATACCGCCTTAAA   |
| <i>Pdcd1</i>                                            | CTGGTCATTCACCTTGGGCTG  | AAACCATTACAGAAGGCGGC   |
| <i>Icos</i>                                             | TGCCGTGTCTTTGTCTTCTG   | CTTCCCTTGGTCTTGGTGAG   |
| <i>Gzmb</i>                                             | CAAAGACCAAACGTGCTTCC   | CTCAGCTCTAGGGACGATGG   |
| <i>Prdm1</i>                                            | ACAGAGGCCGAGTTTGAAGAGA | AAGGATGCCTCGGCTTGAA    |
| <i>Batf</i>                                             | CACAGAAAGCCGACACCCTT   | CTCGGTGAGCTGTTTGATCTCT |
| <i>Slamf6</i>                                           | CCCTGGAATGCAGTATGGTT   | GCTCTGGGAGGACTCTGGAT   |
| <i>Socs1</i>                                            | CCGCTCCCCTCCGATTA      | GCACCAAGAAGGTGCCCA     |
| <i>Mettl3</i>                                           | TAGTTCTAGGCTGGGGAGGT   | ATCACTACGGAAGGTTGGGG   |
| <i>Id2</i>                                              | GTCCTTGCAGGCATCTGAAT   | TTCAACGTGTTCTCCTGGTG   |
| <i>Il6ra</i>                                            | GCAAGAATCCTCGTCCATGT   | GTGGAGGAGAGGTCGTCTTG   |
| <i>Bax</i>                                              | GAACCATCATGGGCTGGACAC  | TGGTCACTGTCTGCCATGTG   |
| <i>Bcl2l11</i>                                          | CGACAGTCTCAGGAGGAACC   | CATTTGCAAACACCCTCCTT   |
| <i>Primers for m<sup>6</sup>A-RIP-qPCR and RIP-qPCR</i> |                        |                        |
| <i>m<sup>6</sup>A-Tcf7</i>                              | TCCGATGACAGTGCTCTAGG   | AAGAGTGAGAGCTGCAGAG    |
